1 **The spectral transmission of non-salticid spider corneas**

2 Zhiyong Hu<sup>1</sup>, Xin Xu<sup>1</sup>, Zhanqi Chen<sup>2</sup>, Hongze Li<sup>1</sup>, Xiaoyan Wang<sup>1</sup>, Lingbing  
3 Wu<sup>1</sup>, Fengxiang Liu<sup>1</sup>, Jian Chen<sup>1</sup>, and Daiqin Li<sup>1,2\*</sup>

4 <sup>1</sup> Centre for Behavioural Ecology & Evolution, College of Life Sciences, Hubei  
5 University, Wuhan 430062, Hubei, China

6 <sup>2</sup> Department of Biological Sciences, National University of Singapore, 14  
7 Science Drive 4, Singapore 117543

8

9 \*Author for correspondence: Daiqin Li

10 Department of Biological Sciences

11 National University of Singapore

12 14 Science Drive 4, Singapore 117543

13 Tel: +65-6516 4372

14 Fax: +65-6779 2486

15 Email: [dbslidq@nus.edu.sg](mailto:dbslidq@nus.edu.sg)

16

17

18

19

20 **ABSTRACT**

21 Although many salticid spiders have been shown to have corneas that transmit  
22 ultraviolet light (UV). Whether the corneas of non-salticid spiders transmit UV  
23 has not been previously investigated. In this study, we determined the spectral  
24 corneal transmission properties of 38 species belonging to 13 non-salticid  
25 families. We used these data to estimate the  $T_{50}$  transmission cut-off value, the  
26 wavelength corresponding to 50% maximal transmission for each species. The  
27 corneas of almost all species from the families Deinopidae, Lycosidae,  
28 Oxyopidae, Pisauridae, Sparassidae and Thomisidae, all of which have been  
29 reported to rely to a substantial extent on vision, transmitted short wavelengths  
30 below 400 nm, ranging from 306 to 381 nm. However, species from the families  
31 Atypidae and Ctenizidae are not known to rely substantially on vision, and the  
32 corneas of these species tended to absorb light of wavelengths below 380 nm,  
33 which may not allow UV sensitivity in these spiders. Liphistiidae, the family  
34 widely regarded as most basal among spiders, is of particular interest. The  
35 species in this family are not known to make substantial use of vision, and yet  
36 we found that liphistiid corneas transmitted UV light with a low  $T_{50}$  value (359  
37 nm).  $T_{50}$  values of non-salticid spider corneas also varied with light habitat.  
38 Species living in dim environments tended to have UV-opaque corneas, but  
39 species inhabiting open areas had UV-transmitting corneas. However, there  
40 was no evidence of corneal transmission properties being related to whether a  
41 species is diurnal or nocturnal.

42 **KEY WORDS: Spiders, Cornea, Spectral transmission, Ultraviolet, Light**  
43 **habitat, Circadian rhythms.**

44

45

## 46 INTRODUCTION

47 Despite exposure to ultraviolet radiation (UV), which reaches Earth's surface at  
48 wavelengths between 290 and 400 nm, being known to damage animal DNA and  
49 tissues, including retinas (Zigman, 1983; Berghahn et al., 1993; Mason et al., 1998;  
50 Williamson and Rose, 2010), UV vision is known to be widespread in animals  
51 (Goldsmith, 1994; Tovée, 1995; Briscoe and Chittka, 2001; Hunt et al., 2001). One  
52 requirement for UV vision is a retina that contains photoreceptors that are sensitive to  
53 UV. However, another more basic requirement for UV vision is the tissues in the  
54 anterior portion of the eye so-called ocular media (i.e., the lens, cornea and vitrea;  
55 Douglas and Marshall, 1999; Siebeck and Marshall, 2001) that must also allow UV  
56 light to reach the retina. The retina can not respond to UV in the absence of UV arriving  
57 at the retina. If UV is not transmitted to the retina, the eye as a whole is not sensitive to  
58 UV, and thus lacking UV vision, regardless of whether the retina contains  
59 photoreceptors that respond physiologically to UV. Any consideration of UV vision in  
60 animals must therefore take into account the spectral transmission properties of their  
61 ocular media (e.g. Siebeck and Marshall, 2000; Siebeck and Marshall, 2001; Siebeck  
62 and Marshall, 2007; Hu et al., 2012). Previous studies of ocular media transmission  
63 have almost exclusively been conducted on vertebrates, particularly on fishes, and have  
64 documented considerable variations in lens and corneal transmission properties (e.g.  
65 Siebeck and Marshall, 2000, 2001, 2007; Eckes et al., 2008). However, very few  
66 studies have been conducted to determine the spectral transmission of ocular media in  
67 invertebrates, including spiders.

68 Spiders usually have eight eyes, and each eye consists of a cornea, which is the  
69 main type of ocular medium (Land and Nilsson, 2012). A recent study measuring the  
70 UV transmission properties of the principal-eye corneas of 128 salticid species revealed  
71 that the corneas of all species examined transmit UV light above 290 nm (Hu et al.,  
72 2012). With about 40,000 species of non-salticid spiders (Platnick, 2014), measuring  
73 the spectral corneal transmission may be a quick way to assess the possibility of UV  
74 vision in a large number of species (Siebeck and Marshall, 2000, 2001, 2007). However,  
75 no study has been conducted to determine the spectral cornea transmission properties of  
76 non-salticid spiders.

77 Our recent study has also shown that the spectral transmission of salticid

78 corneas varies with light habitat (Hu et al., 2012): the corneas of salticids inhabiting  
79 open bush have a higher relative transmission at short wavelengths in the UV spectrum  
80 than do species living in the forest. Non-salticid spiders also live in a wide range of  
81 habitats that differ greatly in photic conditions. The range of wavelengths to which a  
82 spider is sensitive may be tuned to the specific optical habitat in which it lives (Lythgoe,  
83 1972, 1979), which probably enhances its ability to detect mates, prey and predators  
84 within its specific habitat. Because UV light varies in time and place (Endler, 1993;  
85 Flint and Caldwell, 1998), it is instructive to relate the spectral transmission properties  
86 of a spider's ocular media to its various optical habitats.

87         The substantial use of vision or other modalities varies with family and species.  
88 Unlike salticids that have complex eyes and exceptional spatial acuity (Land, 1969;  
89 Blest et al., 1981; Land and Nilsson, 2012; Harland, Li and Jackson, 2012), most  
90 spiders have only poorly developed eyesight (Homann, 1971; Land and Nilsson, 2012)  
91 and make substantial use of vibration and/or chemical cues for communication (Foelix,  
92 2011). Spiders of the families Deinopidae, Lycosidae, Oxyopidae, Pisauridae,  
93 Sparassidae and Thomisidae, all of which have been reported to rely to a substantial  
94 extent on vision, tend to adopt a vision-based lifestyle (Blest and Land, 1977; Blest,  
95 1978; Foelix, 2011). What is more, different spiders have evolved different circadian  
96 rhythmic life styles. Some species such as thomisids are nocturnal and forage at night  
97 (Laughlin et al., 1980; Nørgaard et al., 2008), whereas others such as deinopids and  
98 sparassids are mainly active during the daytime. In addition, some spiders are active  
99 both nocturnally and diurnally (Foelix, 2011). Consequently, non-salticid spiders may  
100 have evolved visual systems to adapt to quite different light conditions specific to their  
101 habitats and adopt different circadian rhythms. It is therefore plausible to ask whether  
102 spiders of different non-salticid families with different lifestyles and living in different  
103 optical habitats have corneas that exhibit different spectral transmission properties.

104         The aim of this study was, therefore, (1) to measure the spectral transmission  
105 properties of the corneas of non-salticid species to determine how widespread UV  
106 transmission of the corneas is in these spiders, and (2) to determine whether corneal  
107 transmission characteristics vary with species, light environment, circadian rhythmic  
108 lifestyle (diurnal, nocturnal or both) and the predominant sensory modality (visual,  
109 tactile or both).

## 110 RESULTS

### 111 General spectral transmission of non-salticid spider corneas

112 In general, the spectra of the 38 non-salticid species examined had similar smooth  
113 transmission curves with a single cut-off and with uniformly high transmission at long  
114 wavelengths, whereas the spectra declined at shorter wavelengths (Fig. 1A). However,  
115 the  $T_{50}$  cut-off transmission value for the cornea, which represents the wavelength  
116 corresponding to 50% maximum transmission, varied considerably with the species  
117 and had a wide range from 306 nm (anterior lateral eyes of the crab spider *Amyciaea*  
118 *forticeps* (O. P.-Cambridge)) to 419 nm (anterior lateral eyes of the crab spider  
119 *Ebrechtella tricuspadata* (Fabricius)) (Table 1).

120 Because all spectra showed about 100% transmission above 400 nm, we  
121 classified the spectral curves primarily on the basis of the slope of the  $T_{50}$  cut-off  
122 position. In general, three classes of corneal transmission spectra can be distinguished  
123 (Fig. 1A). The Class I curve is characterised by a sharp cut-off and a steep slope (Fig.  
124 1A, black curve). Class II consists of curves with a less steep slope and a gradual onset  
125 of the cut-off (Fig. 1A, red curve). Class III is characterised by a more gradual single  
126 cut-off and a gradual slope, which has a decrease of transmission in the long waveband  
127 compared with Classes I and II. Nine (23.7%) of the 38 species had a Class I type  
128 transmission curve, 26 (68.4%) had corneas with a Class II transmission curve, and  
129 only 3 (7.9%) showed a Class III transmission curve (Fig. 1B).

130 The frequencies of the  $T_{50}$  values across the 38 species were distributed  
131 normally (Kolmogorov-Smirnov = 0.121,  $df = 38$ ,  $p = 0.174$ ): most species had the  
132 most prominent peak of the  $T_{50}$  value around either 340 nm or 370 nm, and a few  
133 species had  $T_{50}$  values at shorter wavelengths (2 species: < 320 nm) or at longer  
134 wavebands (2 species: > 400 nm) (Fig. 2).

### 135 Effects of light habitat, circadian rhythmic lifestyle and sensory modality

136 Geographic and ecological information of every collected spider was specifically  
137 recorded, including habitat type, light environment and vegetation types. According to  
138 these data, we classified the spiders into three groups (Table 1): (1) most lycosids, some  
139 oxyopids, and most thomisids inhabiting open shrub, i.e. those active at shrub, fields

140 growing herbaceous plants and bare ground surface receiving full intensive sunlight; (2)  
141 some agelenids, clubionids, some oxyopids, many pisaurids, and most sparassids living  
142 in shade forests, including forest shade, woodland shade, and small and large gaps  
143 under the forest, as described by Endler (1993); and (3) all atypids, ctenizids, deinopids,  
144 gnaphosids, liphistiids and zodariids living in dark burrows, tree holes and under leaf  
145 litter with dim light. In addition, we classified the spiders according to their circadian  
146 rhythmic lifestyle as being nocturnal, diurnal, and both diurnal and nocturnal. Finally,  
147 spiders that differ in the use of a particular communication modality to a substantial  
148 extent were also sorted into three groups (Foelix, 2011): species that rely on tactile  
149 communication; species that make substantial use of vision; and species that use both  
150 tactile- and vision-based communication (Table 1).

151 Results from one-way ANOVAs with species as a confounding factor revealed  
152 a significant difference in corneal transmission  $T_{50}$  values among non-salticid spiders  
153 that adopted quite different sensory modes ( $F_{2,36} = 5.53$ ,  $p = 0.008$ ; Fig. 3).  
154 Vision-based non-salticid spiders had corneal  $T_{50}$  cut-off values significantly lower  
155 than those primarily relying on tactile signals for communication ( $p = 0.002$ ), but there  
156 were no significant differences in corneal  $T_{50}$  values between tactile-based only and  
157 tactile- and vision-based spiders ( $p = 0.221$ ) or between vision-based only and tactile-  
158 and vision-based spiders ( $p = 0.123$ ).

159 Although photic habitat had no overall significant effects on corneal  
160 transmission  $T_{50}$  values ( $F_{2,36} = 3.026$ ,  $p = 0.061$ ; Fig. 3), post-hoc paired comparisons  
161 showed that spiders living in burrows tended to have corneal  $T_{50}$  cut-off values  
162 significantly higher than those inhabiting bright shrub and open areas ( $p = 0.034$ ) and  
163 shaded forests ( $p = 0.035$ ) (e.g. Atypidae: *Calommata signata* Karsch = 382 nm;  
164 Ctenizidae: *Latouchia cornuta* Song, Qiu & Zheng = 390 nm and *Latouchia* sp. 1 = 412  
165 nm; Fig. 4). We found that circadian rhythms had no significant effects on corneal  
166 transmission  $T_{50}$  values ( $F_{2,36} = 0.642$ ,  $p = 0.532$ ; Fig. 3).

167

## 168 **DISCUSSION**

169 Some salticids are known to have photoreceptors sensitive to UV (Harland et al., 2012)  
170 and UV-transmitting corneas are widespread in salticids (Hu et al., 2012). By

171 measuring the corneal transmission of the eyes of 38 non-salticid spider species  
172 belonging to 13 families, we found that the corneas of a majority of the species  
173 transmitted the UV wavelengths below 400 nm, with a range from 306 to 381 nm. As  
174 expected, the corneal spectral transmission of non-salticid species varied with species,  
175 primary communication mode, and photic environment, but not with diurnal or  
176 nocturnal lifestyle. This is the first investigation, to our knowledge, of corneal  
177 transmission in spiders other than salticid spiders, and it suggests that UV vision may  
178 be widespread in spiders that are known to rely to a substantial extent on vision.

179         An animal that possesses UV-sensitive photoreceptors may be insensitive to UV  
180 wavelengths if its ocular media block UV light (Håstad et al., 2009). With both  
181 UV-sensitive photoreceptors in the retina and UV-transmitting ocular media, the animal  
182 should be UV sensitive. Our study showed that almost all species from the families  
183 Deinopidae, Lycosidae, Oxyopidae, Pisauridae, Sparassidae and Thomisidae, all of  
184 which are known to make substantial use of vision, have the corneas that transmit short  
185 wavelengths ranging from 306 to 381 nm. Many thomisids are known to be sit-and-wait  
186 predators that rest on flowers and ambush pollinating insects (e.g., Morse, 2007). Some  
187 thomisids can reflect UV light and use UV contrast to enhance prey capture (Heiling et  
188 al., 2003; Bhaskara et al., 2009; Gawryszewski, 2011; Herberstein and Gawryszewski,  
189 2013; but Brechbühl et al., 2010). A recent study using electrophysiological recording  
190 combined with selective adaptation revealed the presence of UV receptors in the eyes  
191 of the thomisid *Misumena vatia* (Clerck) (Defrize et al., 2011). DeVoe (1972) found  
192 that photoreceptor cells of both principal, i.e. the anterior median and anterior lateral  
193 eyes of lycosids have dual peak sensitivities at both the UV wavelengths of 360-380 nm  
194 and the human-visible wavelengths of 505-510 nm. Our findings here show that these  
195 species also have corneas that transmit UV. Taken together, these findings indicate that  
196 UV vision may be common in thomisids and lycosids. Although our results do not  
197 definitely address whether there are any adaptive benefits for transmitting UV in these  
198 spiders, this would be well worth examining.

199         Deinopids are nocturnal predators that catch insects passing beneath them by  
200 throwing a silk net over them (Foelix, 2011). They have a pair of enlarged posterior  
201 median eyes. Although, their eyes have a great visual capability and have been  
202 modified for nocturnal vision (Blest and Land, 1977), there are only single-type

203 photoreceptor cells with sensitivity peaking at human-visible wavelengths around 517  
204 nm in the posterior median retina of *Deinopis subrufa* L. Koch (Laughlin et al., 1980).  
205 It is also known that the nocturnal hunting sparassid *Leucorchestris arenicola*  
206 Lawrence (Sparassidae) has single-type photoreceptor cells that are sensitive to  
207 human-visible wavelengths ranging from about 525 to 540 nm (Nørgaard et al., 2008).  
208 Although these findings imply that deinopids and sparassids may be colour-blind, as at  
209 least two types of photoreceptors are needed for an animal to be able to discriminate  
210 between different wavelengths of light (Jacobs, 1981; Kelber et al., 2003), with corneas  
211 transmitting wavelengths above 335 nm, deinopids and sparassids may be able to detect  
212 UV light. In spite of having UV-transmitting corneas, UV-sensitive photoreceptors are  
213 largely unknown in oxyopidid and pisauridid.

214 Spiders from the families Atypidae and Ctenizidae living in burrows are not  
215 known to rely substantially on vision, and the corneas of these species tended to have a  
216  $T_{50}$  cut-off wavelength value above 390 nm (Table 1). Although it is not known whether  
217 they have UV-sensitive photoreceptors, we can predict that these spiders may not be  
218 UV sensitive because their corneas block UV light. Being the family widely regarded as  
219 “living fossils”, an ancient lineage that is sister to all extant spiders, Liphistiidae is of  
220 particular interest. The species in this family are not known for making substantial use  
221 of vision, and yet we found that UV radiation readily passes through the liphistiid  
222 corneas. However, future work is needed to determine the presence of UV-sensitive  
223 photoreceptors in liphistiids and the importance of the detection of UV in their  
224 behaviour. It is also worth noting that although our results show considerable  
225 species-specific variation in the spectral transmission properties, such differences must  
226 still be tested using a phylogenetic framework.

227 Interestingly, there is a substantial difference in the corneal transmission  $T_{50}$   
228 cut-off values among non-salticid spiders living in different habitats. This implies that  
229 there may be a strong correlation between the light habitat and corneal transmission of  
230 these spiders. In spite of some exceptions (e.g., the crab spider *E. tricuspidata*; Table 1),  
231 spiders inhabiting forest shades and burrows where there is a lower level of  
232 illumination or the shift in the ambient light spectrum to longer wavelength tended to  
233 have corneas with a higher  $T_{50}$  cut-off value than those living in open areas, where there  
234 are high levels of sunlight. This is consistent with the salticids that have already been



235 examined (Hu et al., 2012).

236 Diurnal or nocturnal lifestyle does not seem to strongly correlated with the  
237 corneal transmission characteristics of non-salticid spiders. One possible explanation is  
238 that some vision-based non-salticid spiders have a shorter  $T_{50}$  cut-off wavelength but  
239 they are active at night, e.g. *Deinopis liukuensis* Yin, Griswold & Yan (Deinopidae: 335  
240 nm), *Heteropoda helge* Jäger (Sparassidae: 343 nm) and *Heteropoda* sp. 1 (Sparassidae:  
241 323 nm). However, spiders from both of these families (Deinopidae and Sparassidae)  
242 are found to have only one type of photoreceptor in their eyes, with sensitivity peaking  
243 at human-visible wavelengths around 517 nm in deinopids (Laughlin et al., 1980) and  
244 ranging from about 525 to 540 nm in *L. arenicola* (Sparassidae) (Nørgaard et al., 2008).  
245 They may be able to detect UV, however, with only a single pigment they can not  
246 differentiate UV from non UV light, and any UV photons may just contribute to the  
247 sensation of light present.

248 It has long been recognised that UV sensitivity comes at a cost because in  
249 many animals, high-energy solar UV has the potential to damage the ocular tissues of  
250 their eyes (Zigman, 1971; Berghahn et al., 1993; Williamson and Rose, 2010),  
251 including the retina (Paul and Gwynn-Jones, 2003). It seems obvious then that an  
252 animal that is habitually exposed to high levels of UV would benefit from a  
253 UV-blocking filter that prevents these wavelengths from reaching the retina. However,  
254 the occurrence of UV transmission in the corneas of many of the measured non-salticid  
255 species implies that the majority of these species do not have such a UV-blocking filter.  
256 Although it is unclear whether UV radiation has the potential to damage the ocular  
257 tissues of spider eyes, the results from our study suggest that seeing UV light may  
258 confer an advantage that overrides the potential cost of UV damage. Alternatively,  
259 since non-salticid spiders are short lived, the DNA damage caused by UV radiation may  
260 not have significant impact on them even though they lack UV-blocking filters in their  
261 eyes.

## 262 **MATERIALS AND METHODS**

### 263 **Study subjects**

264 We collected 59 individuals of spiders belonging to 38 species and 13 families from  
265 China (Hubei, Hunan, Shandong, Shanxi and Yunnan Provinces) (Table 1). Spiders

266 were maintained by following a protocol similar to that of earlier studies (Lim and Li,  
267 2004; Lim and Li, 2006; Lim et al., 2007; Li et al., 2008; Hu et al., 2012). They were  
268 individually housed in plastic cylindrical cages (diameter  $\times$  height: 60  $\times$  80 mm), fed  
269 with a diet of fruit flies (*Drosophila melanogaster* Meigen) once a week, and  
270 maintained in a laboratory with controlled environmental conditions (temperature: 25  $\pm$   
271 1°C; relative humidity: 70-90%; light regime: 12/12 h light/dark cycle; lights on at 0800  
272 h). The spiders were used for the measurement of corneal transmission within a week  
273 after collection. Only living specimens were used for measurements.

#### 274 **Measurements of corneal transmission**

275 We used a procedure similar to that described in an early study (Hu et al., 2012) to  
276 measure the transmission spectra (280-700 nm) of the non-salticid spider corneas. The  
277 transmission measurements were made with an Ocean Optics USB2000 spectrometer  
278 (Ocean Optics, Dunedin, FL, USA). Before the measurements, we anaesthetised each  
279 spider with CO<sub>2</sub> gas, immersed it in a 0.9% physiological salt solution (in millimoles  
280 per liter: Na, 223; K, 6.8; Ca, 4; Cl, 258) (DeVoe, 1972) in a small Petri dish (9  $\times$  2 cm),  
281 cut the whole eye from the cephalothorax and isolated the cornea from other parts of the  
282 eye under a stereomicroscope as soon as possible to avoid artifacts of tissue degradation  
283 (Douglas and McGuigan, 1989). For the measurements, we directly mounted the  
284 isolated cornea on the pinhole of a quartz fiberoptic probe (50  $\mu$ m diameter) (Ocean  
285 Optics, Dunedin, FL, USA), which was held by a modified microscope stand. To  
286 ensure that the cornea was well mounted on the pinhole, a portable magnifying glass  
287 was used to monitor this procedure. The cornea was then illuminated from above by a  
288 full-spectrum (200-1100 nm) light source (DH-2000; Ocean Optics, Dunedin, FL,  
289 USA). The light signal directly penetrated the cornea, passed through the underlying  
290 pinhole into the fiberoptic probe receiver, and was delivered to the USB2000  
291 spectrometer (Siebeck and Marshall, 2001, 2007; Hu et al., 2012). We measured only  
292 the central area of the cornea. All of the transmission readings were obtained relative to  
293 a dark reference (lights off in a dark room). Five measurements of light transmission  
294 were taken and averaged for each cornea.

#### 295 **Estimation of T<sub>50</sub> cut-off transmission value**

296 The absolute transmission of the cornea could be altered by artifactual changes in the

297 position of the cornea covering the pinhole of the quartz fiberoptic probe during each  
298 measurement (Douglas and McGuigan, 1989; Hu et al., 2012). Therefore, to eliminate  
299 any artifactual variation in absolute transmission and to characterise the corneal  
300 transmission, we estimated the  $T_{50}$  cut-off transmission value for the cornea, which  
301 represents the wavelength corresponding to 50% maximum transmission in the  
302 equation of linear regression, similar to that in earlier studies (Partridge 1989; Douglas  
303 and McGuigan, 1989; Hu et al., 2012). In doing so, transmission spectra were first  
304 normalised by making a spectral scan (1219 points between 280 and 700 nm) equal to  
305 100% transmission at 700 nm in each spectrum. We then found out a point at 50% of  
306 the maximum transmission among these 1219 points and used 30 points on either side  
307 of this point (range of 22 nm) to generate the equation of the linear regression line.  
308 Finally, the wavelength corresponding to 50% maximum transmission on the  
309 regression line was considered the  $T_{50}$  cut-off wavelength value. For convenience, we  
310 used the terms  $T_{50}$  value and  $T_{50}$  cut-off value interchangeably.

311

312 **LIST OF SYMBOLS AND ABBREVIATIONS**

313 AM: anterior median eyes

314 AL: anterior lateral eyes

315 BS: open shrub

316 D: diurnal

317 DB: dark burrows

318 D-N: diurnal-nocturnal

319 N: nocturnal

320 PA: posterior median eyes

321 PL: posterior lateral eyes

322 SF: shade forests

323 T: tactile-based

324  $T_{50}$ : the wavelength corresponding to 50% maximum transmission

325 T-V: tactile- and vision-based

326 UV: ultraviolet

327 V: vision-based

328 VIS: human-visible wavelengths

329

330

331

332

333 **ACKNOWLEDGEMENTS**

334 We are very grateful to Tsyr-Huei Chiou, Hua Duan, N. Justin Marshall,  
335 Yingying Ren, Ulrike E. Siebeck and Shoupan Yin for their technical advice. We  
336 thank Wenjin Gan, Matjaž Gregorič, Matjaž Kuntner, Jie Liao, and Lingbing Wu  
337 for collecting the spiders; to Jie Liu for identifying some of the species; and to  
338 Wenjin Gan, Jie Liu, Yu Peng, Yingying Ren and Shoupan Yin for their support  
339 and help. Valuable and generous assistance was provided by the  
340 Xishuangbanna Tropical Botanic Garden (XTBG) at the Chinese Academy of  
341 Sciences. Special thanks are extended to Jin Chen, Liming Li and Zhihu Li from  
342 the XTBG for their generous assistance, without which this study would not  
343 have been possible.

344 **AUTHOR CONTRIBUTIONS**

345 Z.Y.H., X.X., Z.Q.C., J.C. and D.L. were involved in the conception of the study  
346 and experimental design. Z.Y.H., X.X., Z.Q.C., H.Z.L., X.Y.W., L.B.W. and F.X.L.  
347 performed the experiments. Z.Y.H., X.X., Z.Q.C. and D.L. performed data  
348 analyses and drafted the manuscript. Z.Y.H., X.X., Z.Q.C., H.Z.L., X.Y.W.,  
349 L.B.W., J.C. and D.L. revised the manuscript.

350 **COMPETING INTERESTS**

351 No competing interests are declared.

352 **FUNDING**

353 This study was supported by grants from the National Science Foundation of  
354 China (30470229 and 31272324 to D.L.) and from the Ministry of Education  
355 Academic Research Fund (AcRF) Tier 2 (R-154-000-476-112).

356

357

358

359

360 REFERENCES

- 361 **Berghahn, R., Bullock, A. M. and Karakiri, M.** (1993). Effects of solar  
362 radiation on the population dynamics of juvenile flatfish in the shallows of  
363 the Wadden Sea. *J. Fish Biol.* **42**, 329–345.
- 364 **Bhaskara R. M., Brijesh, C. M., Ahmed, S. and Borges, R. M.** (2009).  
365 Perception of ultraviolet light by crab spiders and its role in selection of  
366 hunting sites. *J. Comp. Physiol. A* **195**, 409–417.
- 367 **Blest, A.D.** (1978). The rapid synthesis and destruction of photoreceptor  
368 membrane by a dinopid spider: a daily cycle. *Proc. R. Soc. Lond. B* **200**,  
369 463-483.
- 370 **Blest, A. D., Hardie, R. C., McIntyre, P. and Williams, D. S.** (1981). The  
371 spectral sensitivities of identified receptors and the function of retinal  
372 tiering in the principal eyes of a jumping spider. *J. Comp. Physiol. A* **145**,  
373 227-239.
- 374 **Blest, A.D. and Land, M.F.** (1977) The physiological optics of *Dinopis subrufus*  
375 L. Koch: a fish lens in a spider. *Proc. R. Soc. Lond. B* **196**, 197-222.
- 376 **Brechbühl, R., Casas, J. and Bacher, S.** (2010). Ineffective crypsis in a crab  
377 spider: a prey community perspective. *Proc. R. Soc. Lond. B* **277**,  
378 739–746.
- 379 **Briscoe, A. D. and Chittka, L.** (2001). The evolution of color vision in insects.  
380 *Annu. Rev. Entomol.* **46**, 471–510.
- 381 **Defrize, J., Théry, M. and Casas, J.** (2011). Background colour matching by a  
382 crab spider in the field: a community sensory ecology perspective. *J. Exp.*  
383 *Biol.* **213**, 1425–1435.
- 384 **DeVoe, R. D.** (1972). Dual sensitivities of cells in wolf spider eyes at ultraviolet  
385 and visible wavelengths of light. *J. Gen. Physiol.* **59**, 247-269.
- 386 **Douglass, R. H. and Marshall, N. J. (1999).** A review of vertebrate and  
387 invertebrate ocular filters. In *Adaptive mechanisms in the ecology of vision*  
388 (ed S. N. Archer, M. B. A. Djamgoz, E. R. Loew, J. C. Partridge and S.  
389 Vallerga), pp. 95-162. The Netherlands: Kluwer Academic Publisher.
- 390 **Douglas, R. H. and McGuigan, C. M.** (1989). The spectral transmission of  
391 freshwater teleost ocular media--an interspecific comparison and guide to  
392 potential ultraviolet sensitivity. *Vision Res.* **29**, 871–879.

- 393 **Eckes, M.J., Siebeck, U.E., Dove S. and Grutter, A.S.** (2008). Ultraviolet  
394 sunscreens in reef fish mucus. *Marine Ecol. Progr. Ser.* **353**, 203-211. doi:  
395 10.3354/meps07210.
- 396 **Endler, J. A.** (1993). The colour of light in forests and its implications. *Ecol*  
397 *Mono.* **63**, 1–27.
- 398 **Flint, S. D. and Caldwell, M. M.** (1998). Solar UV-B and visible radiation in  
399 tropical forest gaps: measurements partitioning direct and diffuse radiation.  
400 *Glob. Change Biol.* **4**, 863–870.
- 401 **Foelix, R.F.** (2011). *Biology of Spiders, 3<sup>rd</sup> edition*. New York: Oxford University  
402 Press.
- 403 **Gawryszewski, F. M.** (2011). *Colouration in Crab Spiders (Thomisidae):*  
404 *Mechanism, Function and Evolution*. PhD Thesis, Macquarie University.
- 405 **Goldsmith, T. H.** (1994). Ultraviolet receptor and color vision: evolutionary  
406 implications and a dissonance of paradigms. *Vision Res.* **34**, 1479–1487.
- 407 **Harland, D.P., Li, D. and Jackson, R. R.** (2012). How jumping spider see the  
408 world. In *How animals see the world* (ed. O. F. Lazareva, T. Shimizu and  
409 E. A. Wasserman), pp. 133–163. Oxford: Oxford University Press.
- 410 **Håstad, O., Partridge, J. C. and Ödeen, A.** (2009). Ultraviolet photopigment  
411 sensitivity and ocular media transmittance in gulls, with an evolutionary  
412 perspective. *J. Comp. Physiol. A* **195**, 585–590.
- 413 **Heiling, A.M., Herberstein, M.E. and Chittka, L.** (2003). Pollinator attraction:  
414 crab-spiders manipulate flower signals. *Nature* **421**, 334.
- 415 **Herberstein, M. E and Gawryszewski, F. M.** (2013). UV and camouflage in  
416 crab spiders (Thomisidae). In *Spider Ecophysiology* (ed. W. Nentwig), pp.  
417 349–359. Berlin Heidelberg: Springer-Verlag.
- 418 **Homann, H.** (1971). Die Augen der Araneen. Anatomie, Ontogenie und  
419 Bedeutung für die Systematik (Chelicerate, Arachnida). *Z. Morphol. Oekol.*  
420 *Tiere* **69**, 201–272.
- 421 **Hu, Z.Y., Liu, F.X., Xu, X., Chen, Z.Q., Chen, J. and Li, D.** (2012). The  
422 spectral transmission of the principal-eye corneas of jumping spiders:  
423 implications for ultraviolet vision. *J. Exp. Biol.* **215**, 2853–2859
- 424 **Hunt, D. M., Wilkie, S. E., Bowmaker, J. K. and Poopalasundaram, S.**  
425 (2001). Vision in the ultraviolet. *Cell. Mol. Life Sci.* **58**, 1583–1589.

- 426 **Jacobs, G.H.** (1981). *Comparative color vision*. New York: Academic Press.
- 427 **Kelber, A., Vorobyev, M. and Osorio, D.** (2003). Animal colour vision –  
428 behavioural tests and physiological concepts. *Biol. Rev.* **78**, 81–118.
- 429 **Land, M. F.** (1969). Structure of the retinae of the eyes of jumping spiders  
430 (Salticidae: Dendryphantinae) in relation to visual optics. *J. Exp. Biol.*  
431 **51**, 433–470.
- 432 **Land, M. F. and Nilsson, D. E.** (2012). *Animal Eyes, 2<sup>nd</sup> Edition*. Oxford:  
433 Oxford University Press.
- 434 **Laughlin, S., Blest, A. D. and Stowe, S.** (1980). The sensitivity of receptors in  
435 the posterior median eye of the nocturnal spider, *Dinopis*. *J. Comp. Physiol.*  
436 **141**, 53–65.
- 437 **Li, J. J., Zhang, Z. T., Liu, F. X., Liu, Q. Q., Chen, J., Lim, M. L. M. and Li, D.**  
438 (2008). UVB-based mate choice cues used by females of the jumping  
439 spider *Phintella vittata*. *Curr. Biol.* **18**, 699–703.
- 440 **Lim, M. L. M. and Li, D.** (2004). Courtship and male-male agonistic behaviour  
441 of *Cosmophasis umbratica* Simon, an ornate jumping spider (Araneae:  
442 Salticidae) from Singapore. *Raffles Bull. Zool.* **52**, 435–448.
- 443 **Lim, M. L. M. and Li, D.** (2006). Behavioural evidence of UV sensitivity in  
444 jumping spiders (Araneae: Salticidae). *J. Comp. Physiol. A* **192**, 871–878.
- 445 **Lim, M. L. M., Land, M. F. and Li, D.** (2007). Sex-specific UV and fluorescent  
446 signals in jumping spiders. *Science* **315**, 481.
- 447 **Lythgoe, J. N.** (1972). The adaptations of visual pigments to the photic  
448 environment. In *Handbook of sensory physiology* (III/1) (ed. H. Autrum, R.  
449 Jung, W. R. Loewenstein, D. M. MacKay and H. L. Teuber), pp. 567–600.  
450 Berlin: Springer.
- 451 **Lythgoe, J.** (1979). *The Ecology of Vision*. Oxford: Clarendon Press.
- 452 **Mason, D. S., Schafer, F., Shick, J. M. and Dunlap, W. C.** (1998). Ultraviolet  
453 radiation-absorbing mycosporine-like amino acids (MAAs) are acquired  
454 from their diet by medaka fish (*Oryzias latipes*) but not by SKH-1 hairless  
455 mice. *Comp. Biochem. Physiol. A* **120**, 587–598.
- 456 **Morse, D. H.** (2007). *Predation upon a Flower: Life History and Fitness in a*  
457 *Crab Spider*. Cambridge: Harvard University Press.
- 458 **Nørgaard, T., Nilsson, D., Henschel, J. R., Garm, A. and Wehner, R.** (2008).



459 Vision in the nocturnal wandering spider *Leucorchestris arenicola*  
460 (Araneae: Sparassidae). *J. Exp. Biol.* **211**, 816–823.

461 **Partridge, J. C.** (1989). The visual ecology of avian cone oil droplets. *J. Comp.*  
462 *Physiol. A* **165**, 415–426.

463 **Paul, N. D. and Gwynn-Jones, D.** (2003). Ecological roles of solar UV  
464 radiation: towards an integrated approach. *Trends Ecol. Evol.* **18**, 48–55.

465 **Platnick, N. I.** (2014). *The World Spider Catalog, Version 14.5* (ed. P. Merret  
466 and H. B. Cameron). New York: The American Museum of Natural History.

467 **Siebeck, U. E. and Marshall, N. J.** (2000). Transmission of ocular media in  
468 labrid fishes. *Proc. R. Soc. Lond. B* **355**, 1257–1261.

469 **Siebeck, U. E., and Marshall, N. J.** (2001). Ocular media transmission of coral  
470 reef fish--can coral reef fish see ultraviolet light? *Vision Res.* **41**, 133–149.

471 **Siebeck, U. E., and Marshall, N. J.** (2007). Potential ultraviolet vision in  
472 pre-settlement larvae and settled reef fish--a comparison across 23  
473 families. *Vision Res.* **47**, 2337–2352.

474 **Tovée, M. J.** (1995). Ultra-violet photoreceptors in the animal kingdom: their  
475 distribution and function. *Trends Ecol. Evol.* **10**, 455–460.

476 **Williamson, C. E. and Rose, K. C.** (2010). When UV meets fresh water.  
477 *Science* **329**, 637–638.

478 **Zigman, S.** (1983). Effects of near ultraviolet radiation on the lens and retina.  
479 *Docum. Ophthalmol.* **55**, 375-391.

480

481 **Figure Legends**

482 **Fig. 1. General corneal transmission characteristics of non-salticid**  
483 **spiders.** (A) Representative examples of the three different classes, Class I,  
484 Class II and Class III, of corneal transmission curves of non-salticid spiders.  
485 Class I: corneal transmission spectrum of *Pardosa falcata* (Lycosidae) (black);  
486 Class II: corneal transmission spectrum of *Oxytate hoshizuna*  
487 (Thomisidae)(red:); and Class III: corneal transmission spectrum of Zodariidae  
488 (green). (B) Frequency (number of species) distribution of corneal transmission  
489 curve classes (I, II, III) across sensory modalities (T: tactile-based; V:  
490 vision-based; T-V: tactile- and vision-based).

491 **Fig. 2. Frequency distribution of  $T_{50}$  cut-off wavelengths for the corneas**  
492 **of 38 non-salticid spider species.**

493 **Fig. 3. Boxplot of the  $T_{50}$  cut-off wavelengths of corneal transmission of**  
494 **38 non-salticid spider species** according to the light habitat (BS: bright shrub;  
495 SF: shaded forest; DB: dark burrow), circadian rhythmic lifestyle (D: diurnal; N:  
496 nocturnal; D-N: diurnal-nocturnal) and sensory modality (T: tactile-based; V:  
497 vision-based; T-V: tactile- and vision-based). Boxes show median (line within  
498 the box) and upper (75%) and lower (25%) quartiles, whiskers indicate 95<sup>th</sup>  
499 percentiles, and circles/stars are outliers. Different lowercase letters indicate  
500 significant differences.

501

502

503

504 Table 1. List of the 38 non-salticid spider species with  $T_{50}$  (50% maximal transmission) cut-off wavelength (nm), corneal diameter (mm) of the anterior middle  
 505 (AM), anterior lateral (AL), and posterior (PM) eye, corneal transmission Classes (I, II and III), and carapace width (CW: mm). N: number of specimens

| Family       | Genus              | Species                                  | Habitat | Circadia rhythms | Sensory mode | $T_{50}$ (nm) | Cornea (mm) | CW   | Class | Eye | N |
|--------------|--------------------|------------------------------------------|---------|------------------|--------------|---------------|-------------|------|-------|-----|---|
| Agelenidae   | <i>Allagelena</i>  | <i>difficilis</i> Fox                    | BS      | D                | T            | 340           | 0.17        | 2.46 | I     | AM  | 3 |
|              | <i>Pireneitega</i> | <i>neglecta</i> (Hu)                     | DB      | D                | T            | 375           | 0.28        | 5.24 | II    | AL  | 3 |
|              | <i>Pireneitega</i> | <i>spinivulva</i> (Simon)                | DB      | D                | T            | 371           | 0.23        | 4.18 | II    | AL  | 3 |
| Atypidae     | <i>Calommata</i>   | <i>signata</i> Karsch                    | DB      | D-N              | T            | 382           | 0.23        | 6.09 | III   | AM  | 1 |
| Clubionidae  | <i>Clubiona</i>    | <i>coreana</i> Paik                      | SF      | N                | T            | 369           | 0.15        | 1.97 | II    | AL  | 1 |
|              | <i>Clubiona</i>    | sp.1                                     | SF      | N                | T            | 370           | 0.13        | 1.87 | II    | AL  | 1 |
| Ctenizidae   | <i>Latouchia</i>   | <i>cornuta</i> Song, Qiu & Zheng         | DB      | N                | T            | 390           | 0.31        | 7.44 | III   | AM  | 1 |
|              | <i>Latouchia</i>   | sp.1                                     | DB      | N                | T            | 412           | 0.24        | 3.55 | III   | AM  | 2 |
| Deinopidae   | <i>Deinopis</i>    | <i>liukuensis</i> Yin, Griswold & Yan    | DB      | N                | V            | 335           | 0.46        | 2.07 | II    | PM  | 1 |
| Gnaphosidae  |                    |                                          | DB      | N                | T            | 362           | 0.09        | 1.08 | II    | AM  | 1 |
| Liphistiidae | <i>Heptathela</i>  | <i>xianningensis</i> Yin et al.          | DB      | N                | T            | 359           | 0.26        | 4.5  | II    | AL  | 1 |
| Lycosidae    | <i>Alopecosa</i>   | sp.1                                     | BS      | D-N              | T-V          | 370           | 0.41        | 4.29 | II    | AM  | 1 |
|              | <i>Ocyale</i>      | sp.1                                     | BS      | D-N              | T-V          | 368           | 0.27        | 2.89 | II    | AM  | 1 |
|              | <i>Pardosa</i>     | <i>astrigera</i> L. Koch                 | BS      | D-N              | T-V          | 351           | 0.22        | 2.65 | I     | AM  | 4 |
|              | <i>Pardosa</i>     | <i>falcata</i> Schenkel                  | BS      | D-N              | T-V          | 369           | 0.2         | 2.2  | I     | AM  | 1 |
|              | <i>Pardosa</i>     | <i>laura</i> Karsch                      | BS      | D-N              | T-V          | 371           | 0.23        | 2.74 | I     | AM  | 1 |
|              | <i>Pardosa</i>     | <i>pseudoannulata</i> Bösenberg & Strand | BS      | D-N              | T-V          | 381           | 0.25        | 3.71 | I     | AM  | 2 |
|              | <i>Pardosa</i>     |                                          |         |                  |              |               |             |      |       |     |   |
| Oxyopidae    | <i>Oxyopes</i>     | <i>fujianicus</i> Song & Zhu             | SF      | D-N              | V            | 344           | 0.22        | 2.27 | II    | AL  | 1 |
|              | <i>Oxyopes</i>     | <i>lineatipes</i> (C. L. Koch)           | SF      | D-N              | V            | 368           | 0.27        | 2.46 | I     | AL  | 2 |
|              | <i>Oxyopes</i>     | <i>macilentus</i> L. Koch                | SF      | D-N              | V            | 350           | 0.26        | 2.21 | II    | AL  | 1 |
|              | <i>Oxyopes</i>     | <i>sertatoides</i> Xie & Kim             | BS      | D-N              | V            | 348           | 0.22        | 2.83 | I     | AL  | 3 |
|              | <i>Oxyopes</i>     | <i>sertatus</i> L. Koch                  | BS      | D-N              | V            | 343           | 0.22        | 2.7  | II    | AL  | 3 |
|              | <i>Oxyopes</i>     | sp.1                                     | SF      | D-N              | V            | 368           | 0.18        | 2.21 | II    | AL  | 1 |
|              | <i>Oxyopes</i>     | sp.2                                     | BS      | D-N              | V            | 341           | 0.24        | 3.1  | II    | AL  | 1 |
| Pisauridae   | <i>Dolomedes</i>   | sp.1                                     | SF      | D-N              | T-V          | 331           | 0.14        | 3.32 | II    | AM  | 1 |
|              | <i>Dolomedes</i>   | <i>sulfureus</i> L. Koch                 | SF      | D-N              | T-V          | 348           | 0.27        | 4.12 | II    | AM  | 1 |
| Sparassidae  | <i>Heteropoda</i>  | <i>helge</i> Jäger                       | SF      | N                | V            | 343           | 0.32        | 3.11 | I     | AL  | 1 |
|              | <i>Heteropoda</i>  | sp.1                                     | SF      | N                | V            | 323           | 0.21        | 2.56 | I     | AL  | 1 |
| Thomisidae   | <i>Amyciaea</i>    | <i>forticeps</i> O. P.-Cambridge         | BS      | D                | V            | <b>306</b>    | 0.18        | 1.51 | II    | AL  | 1 |
|              | <i>Camaricus</i>   | <i>formosus</i> Thorell                  | BS      | D                | V            | 358           | 0.17        | 2.69 | II    | AL  | 2 |
|              | <i>Ebrechtella</i> | <i>tricuspidata</i> (Fabricius)          | BS      | D                | V            | <b>419</b>    | 0.09        | 1.7  | II    | AL  | 4 |
|              | <i>Monaeses</i>    | sp.1                                     | BS      | D                | V            | 343           | 0.18        | 3.31 | II    | AL  | 1 |
|              | <i>Oxytate</i>     | <i>hoshizuna</i> Ono                     | BS      | D                | V            | 335           | 0.16        | 2.96 | II    | AL  | 1 |

|            |                 |                                 |    |   |   |     |      |      |    |    |   |
|------------|-----------------|---------------------------------|----|---|---|-----|------|------|----|----|---|
|            | <i>Ozyptila</i> | <i>wuchangensis</i> Tang & Song | BS | D | V | 343 | 0.17 | 2.79 | II | AL | 2 |
|            | <i>Thomisus</i> | <i>labefactus</i> Kansch        | BS | D | V | 341 | 0.1  | 1.6  | II | AL | 1 |
|            | <i>Xysticus</i> | <i>ephippiatus</i> Simon        | BS | D | V | 359 | 0.14 | 1.74 | II | AL | 1 |
|            | <i>Xysticus</i> | sp.1                            | BS | D | V | 339 | 0.12 | 1.41 | II | AL | 1 |
| Zodariidae |                 |                                 | DB | N | T | 371 | 0.19 | 2.24 | II | AL | 1 |

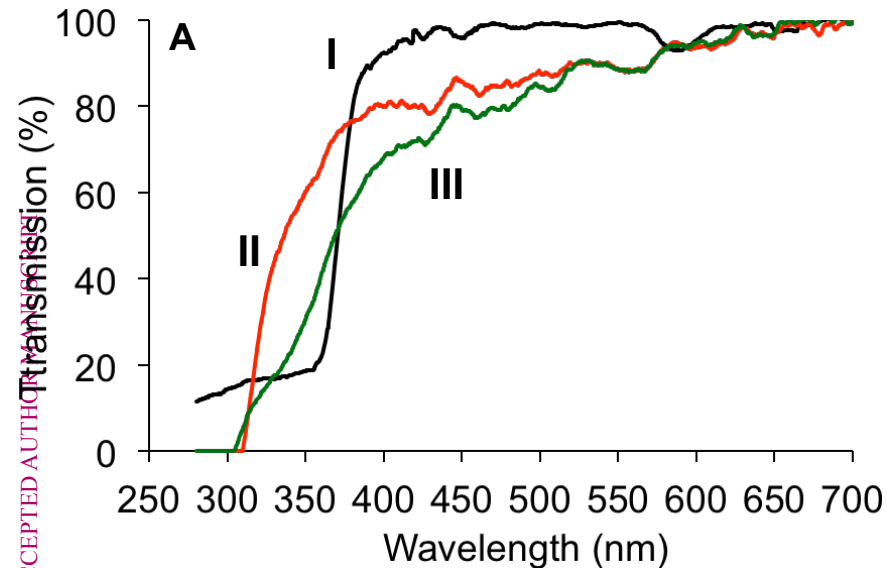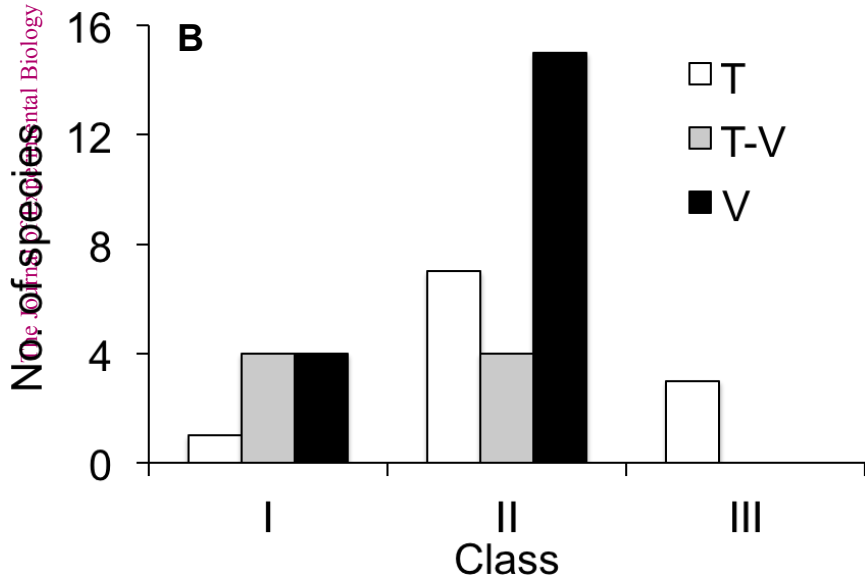

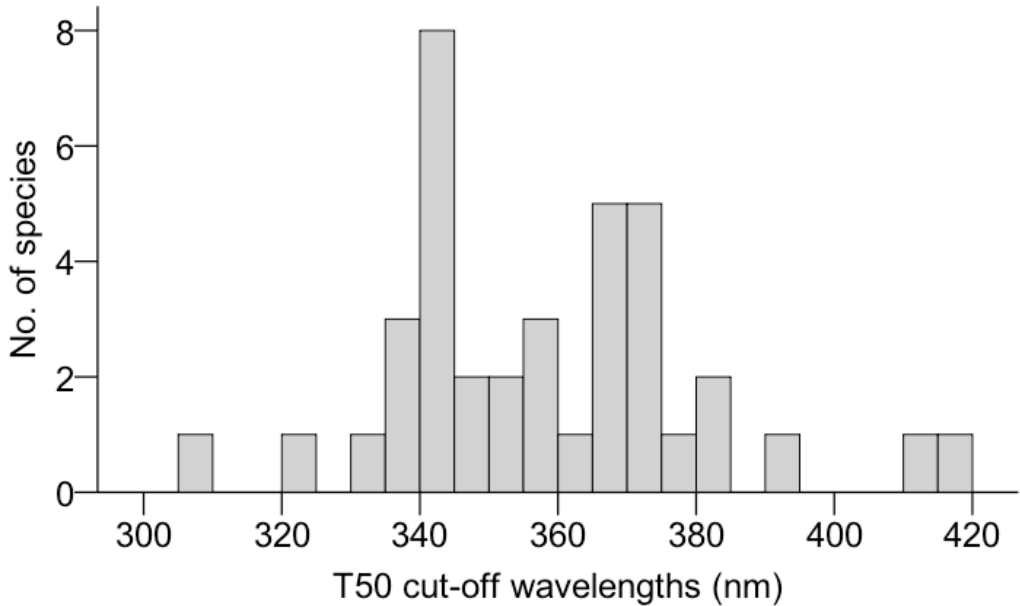

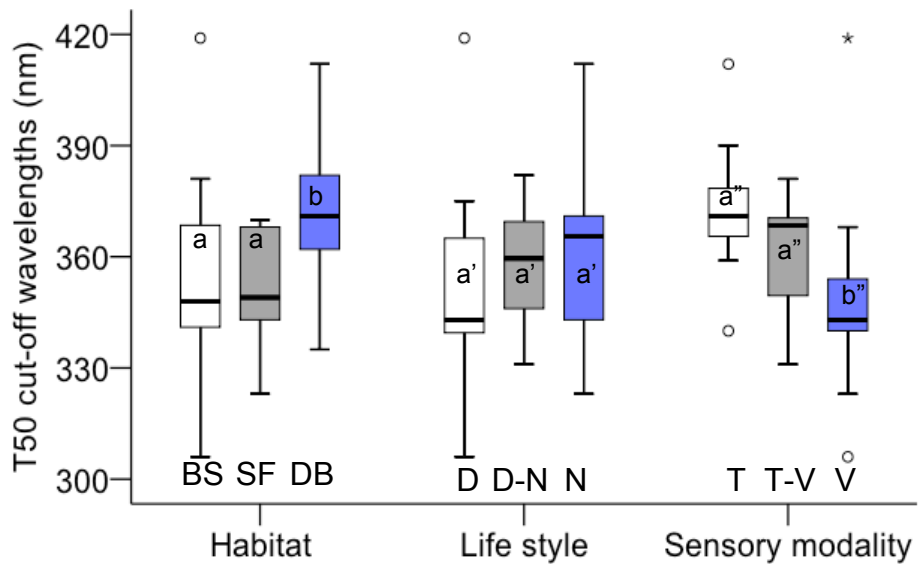

Source: https://cob.silverchair.com/jeb/article-pdf/doi/10.1242/jeb.099069/2037584/jeb_099069.pdf
